# Supplementary material for: The Rapid Implementation of Ad Hoc Tele-Critical Care Respiratory Therapy (eRT) Service in the Wake of the COVID-19 Surge
Source: MDPI journal article supplement (doi:10.3390/jcm11030718), 2022-01-29
Supplement: s1 [file s1]

## Penn EAlert

Resize font:  
 | 

Please complete the survey below after each intervention

Thank you!

Date/Time

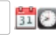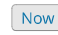

Now

D-M-Y H:M

Initials of Provider

2 characters remaining

Patient MRN

Put 0000001 for Aggregated time for hyperoxia (six ZEROS)

Put 0000002 for Aggregated time for DVT (six ZEROS)

Put 0000003 for Aggregated time for GI (six ZEROS)

Put 0000004 for Aggregated time for APACHE (six ZEROS)

Put 0000005 for Aggregated time for BPH (six ZEROS)

Put 0000006 for Aggregated time for Orders Reconciliation (six ZEROS)

Your role?

☐ eMD☐ eAPP☐ eRN☒ eRT☐ eTHC☐ eRes☐ eMS

reset

Expediency of intervention

☐ Routine☐ Urgent☐ Emergent

reset

Did you respond to:

☐ Push Button☐ Virtual consult☐ eICU staff triage☐ Phone call (from site)☐ Proactive rounding☐ Sniffer/Dashboard Tool (ARDS, sepsis, etc)☐ eCareManager Generated Alert

reset

Site originated

Communication with on-site person

☒ No communication (DEFAULT)☐ Escalation to Penn eAlert staff☐ Medical Director☐ Attending☐ Resident☐ APP/CRNA☐ RN☐ RT☐ Medical resident/fellow☐ Family☐ Administrative staff☐ Other (place a note in Communication)

|                                                    |                                                                                                                                                                                                                                                                                                                                                                                                                                                                                                                                                                                                                                                                            |
|----------------------------------------------------|----------------------------------------------------------------------------------------------------------------------------------------------------------------------------------------------------------------------------------------------------------------------------------------------------------------------------------------------------------------------------------------------------------------------------------------------------------------------------------------------------------------------------------------------------------------------------------------------------------------------------------------------------------------------------|
| <b>Primary focus of the interaction</b>            | <input type="checkbox"/> Clinical intervention<br><input type="checkbox"/> Proactive rounding/Q&S<br><input type="checkbox"/> Education<br><input type="checkbox"/> Debrief<br><input type="checkbox"/> Recording<br><input type="checkbox"/> Other (place a note in Clinical Comment)                                                                                                                                                                                                                                                                                                                                                                                     |
| <b>Task Scope</b>                                  | <input type="checkbox"/> Worsening status / Advanced ventilator/BIPAP management<br><input type="checkbox"/> Worsening status on non intubated/BiPAP patient<br><input type="checkbox"/> Extubation/High risk check list.<br><input type="checkbox"/> Newly extubated surveillance<br><input type="checkbox"/> (PLACEHOLDER _ DO NOT CHECK)<br><input type="checkbox"/> Deferring scheduled checks to the remote team<br><input type="checkbox"/> Prioritize SBT/SAT<br><input type="checkbox"/> TJC compliance with PennChart orders<br><input type="checkbox"/> ARDS & low stretch protocols issues<br><input type="checkbox"/> Other (place a note in Clinical Comment) |
| <b>COVID related</b>                               | <input type="radio"/> Yes<br><input type="radio"/> No<br><a href="#">reset</a>                                                                                                                                                                                                                                                                                                                                                                                                                                                                                                                                                                                             |
| <b>Recommendation placed in EPIC</b>               | <input type="radio"/> Yes<br><input type="radio"/> No<br><a href="#">reset</a>                                                                                                                                                                                                                                                                                                                                                                                                                                                                                                                                                                                             |
| <b>Approximate Total time spent on chart (min)</b> | <input checked="" type="radio"/> 5<br><input type="radio"/> 10<br><input type="radio"/> 15<br><input type="radio"/> 20<br><input type="radio"/> 25<br><input type="radio"/> 30<br><input type="radio"/> 40<br><input type="radio"/> 50<br><input type="radio"/> 60<br><input type="radio"/> more than 1 hour<br><a href="#">reset</a>                                                                                                                                                                                                                                                                                                                                      |
| <b>Complexity</b>                                  | <div><div>Less complex</div><div>Nominal for my expertise and job description</div><div>More Complex</div></div> <div><input type="range"/></div> <div>Change the slider above to set a response</div> <a href="#">reset</a>                                                                                                                                                                                                                                                                                                                                                                                                                                               |
| <b>Clinical Comment</b>                            | <div><div></div><div>200 characters remaining</div><div><a href="#">Expand</a></div></div>                                                                                                                                                                                                                                                                                                                                                                                                                                                                                                                                                                                 |
| <div><a href="#">Submit</a></div>                  |                                                                                                                                                                                                                                                                                                                                                                                                                                                                                                                                                                                                                                                                            |
